# Supplementary material for: The Effect of Cow Breed and Wild Garlic Leaves (Allium ursinum L.) on the Sensory Quality, Volatile Compounds, and Physical Properties of Unripened Soft Rennet-Curd Cheese
Source: MDPI journal article supplement (doi:10.3390/foods11243948), 2022-12-07

## Supplementary material

**Table S1.** The definitions of five quality levels for each selected trait in sensory analysis using a 5-point scale

| Traits                                  | 5                                                                          | 4                                                                     | 3                                                       | 2                                                                  | 1                                                                           |
|-----------------------------------------|----------------------------------------------------------------------------|-----------------------------------------------------------------------|---------------------------------------------------------|--------------------------------------------------------------------|-----------------------------------------------------------------------------|
| Color                                   | White, slightly creamy color or characteristic of the herbal additive      | White, slightly creamy color with slight discoloration                | Creamy color with slight discoloration, slightly uneven | Cream color with a tint of yellow, uneven                          | Yellow to brown, very uneven                                                |
| External and cross-sectional appearance | Uniform cheese, smooth, without lumps, evenly distributed herbal additive  | Delicate cracks, occasionally uneven cheese                           | Cracks, uneven cheese, occasional lumps                 | Clearly uneven cheese, visible lumps                               | Uneven, cracked cheese, visible lumps, unevenly distributed herbal additive |
| Texture                                 | Firm cheese, no lumps                                                      | Firm cheese, slight cracks visible, slightly crumbly, slightly greasy | Greasy, crumbly, cracked cheese                         | Dry, hard or too soft and greasy cheese                            | Very hard or very soft, very cracked, visible lumps                         |
| Taste                                   | Clean, very pleasant, slightly spicy. Perceptible taste of herbal additive | Pleasant, clean, slightly perceptible taste of the herbal additive    | Strong, spicy or tasteless                              | Strong, spicy, noticeable foreign flavors, bitter, slightly rancid | Very unpleasant, foreign, very bitter, very sour, rancid                    |
| Smell                                   | Very pleasant, clean. Perceptible smell of herbal additive                 | Pleasant, clean, slightly perceptible smell of herbal additive        | Sharp, slightly foreign or odorless                     | Foreign, spicy, stale, slightly rancid                             | Unpleasant, clearly stale, rancid                                           |

**Figure S1.** The photos of natural and herbal cheese during molding (A) and during dripping after brining (B)

A

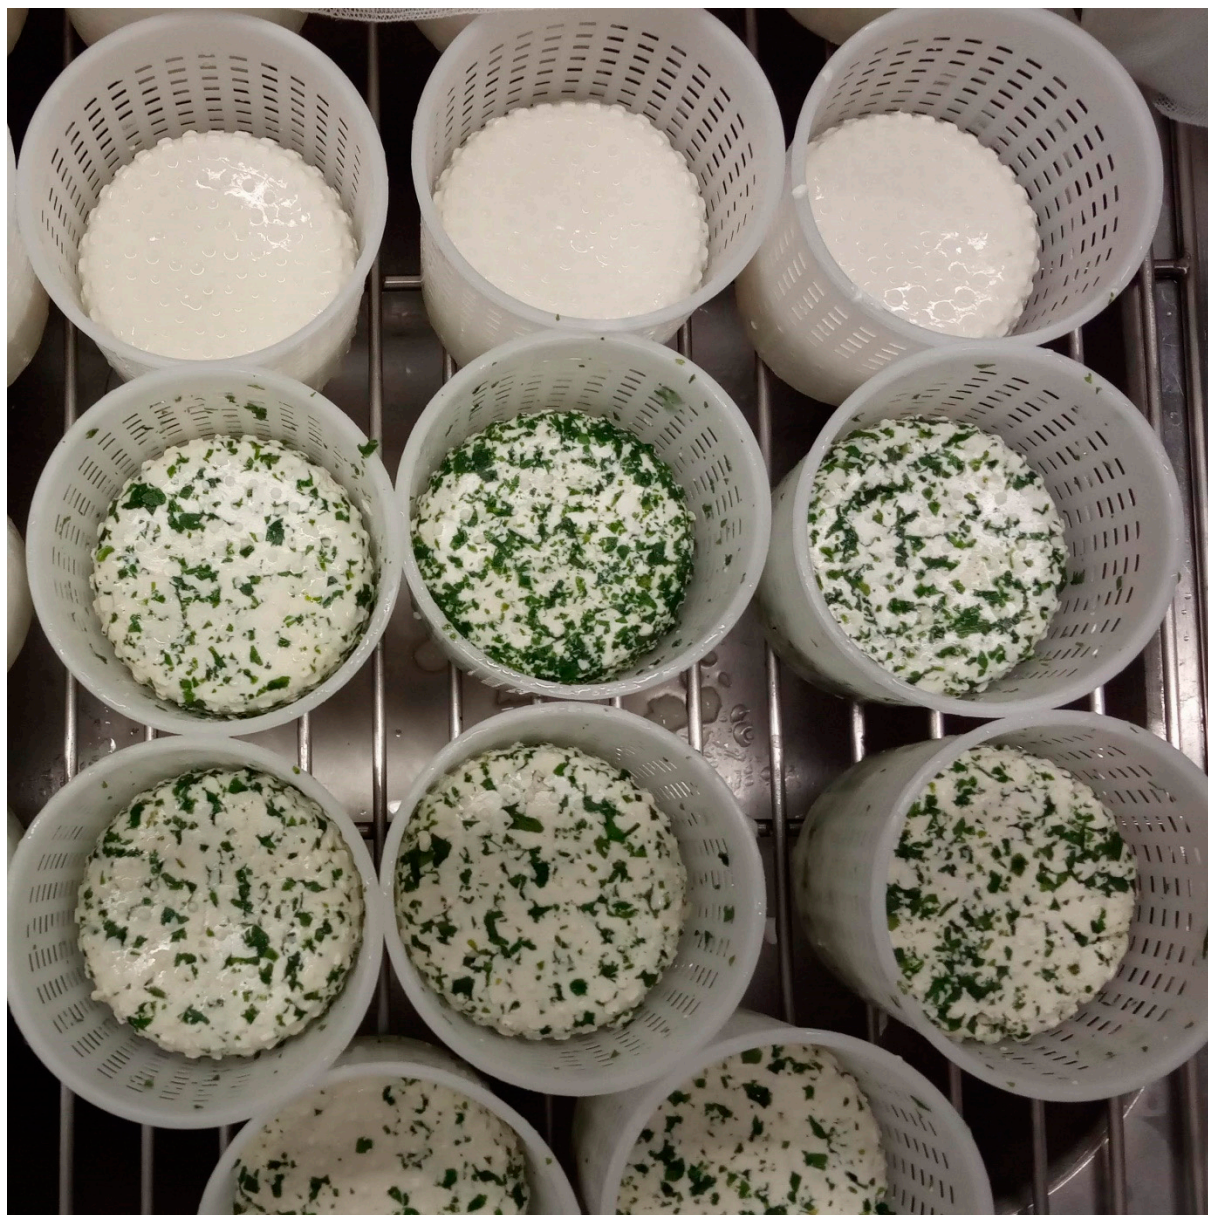

**B**

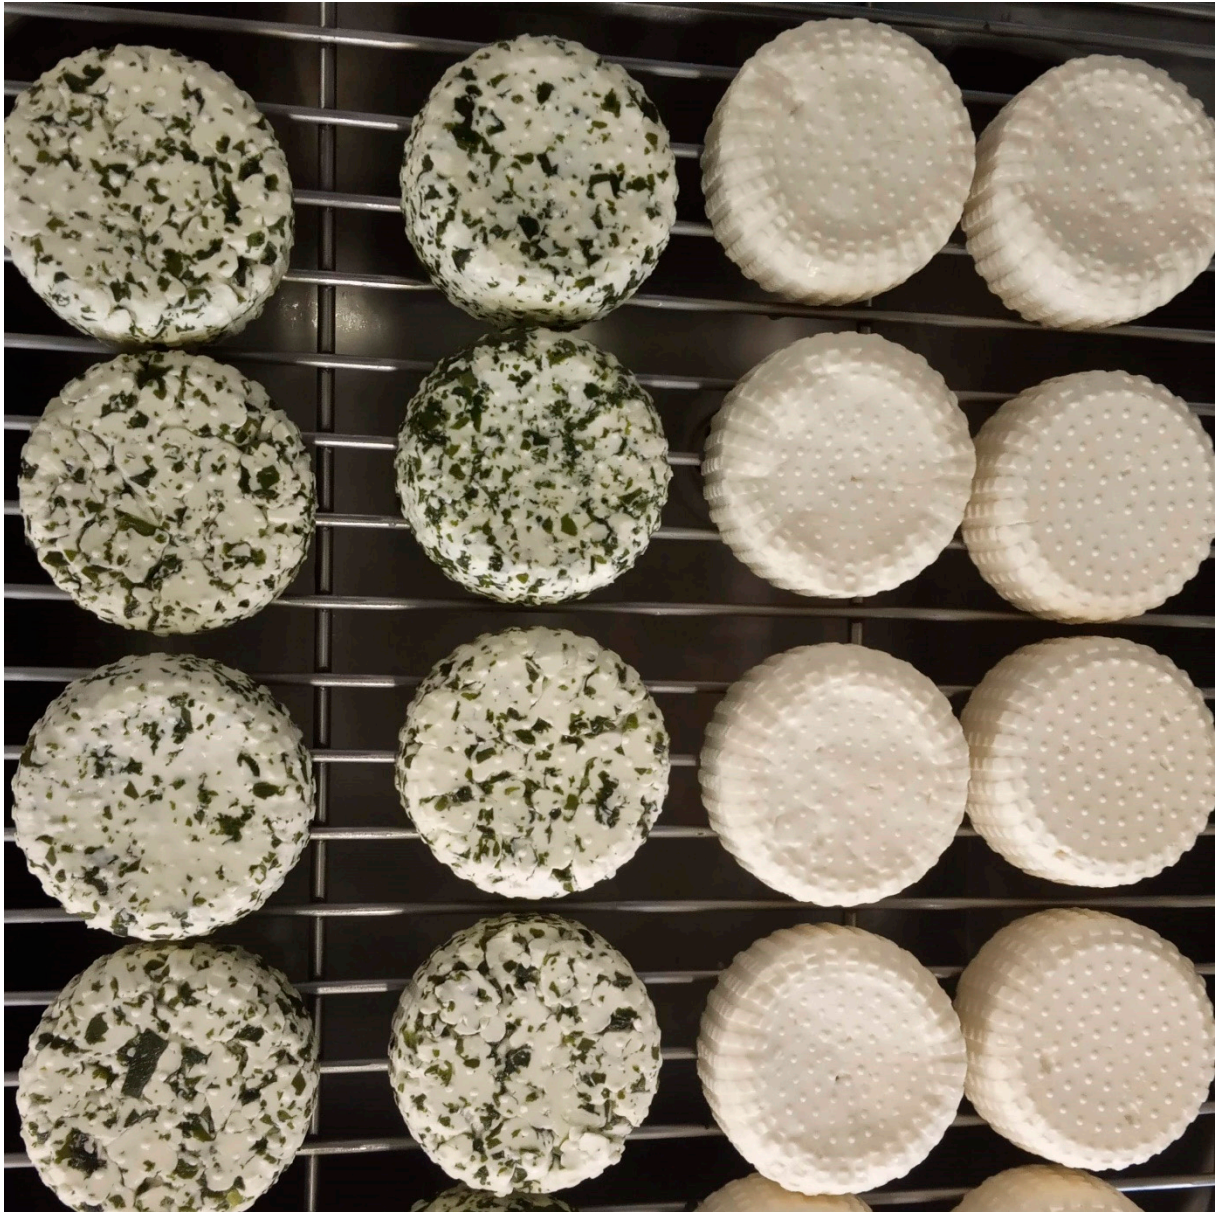

Supplement: s1 [file s1]
